# Supplementary material for: The First Korean Case with Cardiac, Facial, and Digital Anomalies with Developmental Delay Caused by De Novo TRAF7 p.Arg655Gln Variant
Source: MDPI journal article supplement (doi:10.3390/ijms25073701), 2024-03-26
Supplement: s1 [file s1]

**Supplementary Table S1. Variants identified by clinical exome sequencing in the proband with facial, digital, cardiac anomalies with developmental delay**

| Gene          | Reference transcript ID | Base change | Codon change | Variant type | OMIM phenotype                                                                 | Inheritance |
|---------------|-------------------------|-------------|--------------|--------------|--------------------------------------------------------------------------------|-------------|
| <i>ABCA7</i>  | NM_019112.4             | c.5961G>T   | p.Glu1987Asp | missense     | {Alzheimer disease 9, susceptibility to}                                       | AD          |
| <i>AKT2</i>   | NM_001626               | .6c.431G>A  | p.Arg144Gln  | missense     | Diabetes mellitus, type II   Hypoinsulinemic hypoglycemia with hemihypertrophy | AD   AD     |
| <i>ANK3</i>   | NM_020987.              | 5c.8506C>T  | p.His2836Tyr | missense     | Intellectual developmental disorder, autosomal recessive 37                    | AR          |
| <i>DNAH10</i> | NM_207437.3             | c.10444C>T  | p.Arg3482Cys | missense     | Spermatogenic failure 56                                                       | AR          |
| <i>FSIP2</i>  | NM_173651.4             | c.3351G>A   | p.Met1117Ile | missense     | Spermatogenic failure 34                                                       | AR          |
| <i>HSPA9</i>  | NM_004134.7             | c.661A>C    | p.Asn221His  | missense     | Anemia, sideroblastic, 4   Even-plus syndrome                                  | AD   AR     |
| <i>HYDIN</i>  | NM_001270974.2          | c.13080G>T  | p.Glu4360Asp | missense     | Ciliary dyskinesia, primary, 5                                                 | AR          |
| <i>IGSF3</i>  | NM_001542.4             | c.1784G>A   | p.Trp595Ter  | nonsense     | ?Lacrimal duct defect                                                          | AR          |
| <i>ITGA8</i>  | NM_003638.3             | c.3128G>T   | p.Arg1043Ile | missense     | Renal hypodysplasia/aplasia 1                                                  | AR          |
| <i>LIPA</i>   | NM_000235.4             | c.10C>T     | p.Arg4Trp    | missense     | Cholesteryl ester storage disease   Wolman disease                             | AR   AR     |
| <i>RECQL</i>  | NM_002907.4             | c.1784A>G   | p.Gln595Arg  | missense     | RECON progeroid syndrome                                                       | AR          |
| <i>TPP2</i>   | NM_003291.4             | c.1067A>G   | p.Tyr356Cys  | missense     | Immunodeficiency 78 with autoimmunity and developmental delay                  | AR          |
| <i>TRAF7</i>  | NM_032271.3             | c.1964G>A   | p.Arg655Gln  | missense     | Cardiac, facial, and digital anomalies with developmental delay                | AD          |
| <i>VANGL2</i> | NM_020335.3             | c.1319G>A   | p.Arg440Gln  | missense     | Neural tube defects                                                            | AD          |

OMIM, Online Mendelian Inheritance in Man; AD, autosomal dominant; AR, autosomal recessive
